# Supplementary material for: Antimycobacterial activity and molecular docking of methanolic extracts and compounds of marine fungi from Saldanha and False Bays, South Africa
Source: PubMed Central journal article supplement — Heliyon. 2022 Dec 17;8(12):e12406. doi: 10.1016/j.heliyon.2022.e12406 (PMC9793266; doi:10.1016/j.heliyon.2022.e12406), 2022-12-17
Supplement: mmc1.pdf [file mmc1.pdf]

**Supplementary File 2**  
**Chemical structures of identified compounds**

**Table S1**

Metabolites identified from *F. oxysporum* MGK13.

| No. | Proposed ID         | Formula                                         | Structure                                                                            |
|-----|---------------------|-------------------------------------------------|--------------------------------------------------------------------------------------|
| 1   | Dehydrofusaric acid | C <sub>10</sub> H <sub>11</sub> NO <sub>2</sub> | 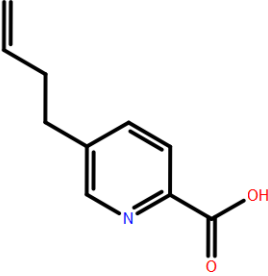   |
| 2   | Fusarinolic acid    | C <sub>10</sub> H <sub>13</sub> NO <sub>3</sub> |   |
| 3   | Fusaric acid        | C <sub>10</sub> H <sub>13</sub> NO <sub>2</sub> |  |

|   |                      |                      |                                                                                     |
|---|----------------------|----------------------|-------------------------------------------------------------------------------------|
| 4 | 3-Dehydrosphinganine | $C_{18}H_{37}NO_2$   | 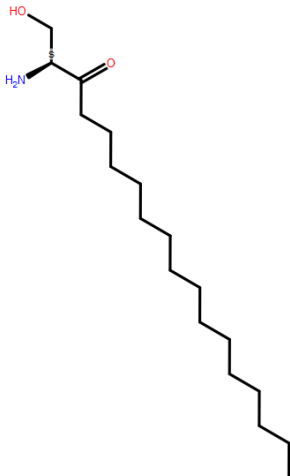  |
| 5 | Beauvericin          | $C_{45}H_{57}N_3O_9$ |  |

**Table S2**

Metabolites from *M. circinelloides* MGK14.

| No. | Proposed ID      | Formula         | Structure                                                                            |
|-----|------------------|-----------------|--------------------------------------------------------------------------------------|
| 6   | Pantothenic acid | $C_9H_{17}NO_5$ | 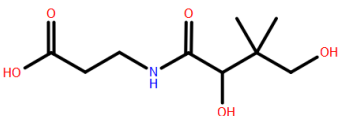 |

**Table S3**Metabolites from *C. eragrosticola* MGK20.

| No. | Proposed ID         | Formula                                                        | Structure                                                                                                                                                                                                                                                                                                                          |
|-----|---------------------|----------------------------------------------------------------|------------------------------------------------------------------------------------------------------------------------------------------------------------------------------------------------------------------------------------------------------------------------------------------------------------------------------------|
| 7   | L-Arginine          | C <sub>6</sub> H <sub>14</sub> N <sub>4</sub> O <sub>2</sub>   | 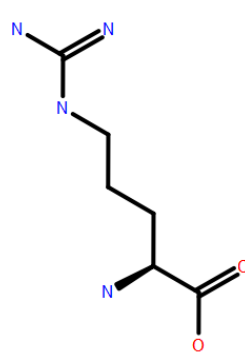 <p>The structure of L-Arginine shows a guanidino group (C(=N)N) attached to a propyl chain, which is further attached to a chiral center. This chiral center is also bonded to a hydrogen atom and a carboxylate group (COO-).</p>              |
| 8   | L-Phenylalanine     | C <sub>9</sub> H <sub>11</sub> NO <sub>2</sub>                 |  <p>The structure of L-Phenylalanine features a benzene ring attached to a CH2 group, which is connected to a chiral center. This chiral center is also bonded to a hydrogen atom, an amino group (NH2), and a carboxylic acid group (COOH).</p> |
| 9   | N-Acetylsphinganine | C <sub>20</sub> H <sub>41</sub> NO <sub>3</sub>                |  <p>The structure of N-Acetylsphinganine consists of a long hydrocarbon chain (sphingosine backbone) with a hydroxyl group (OH) and an N-acetyl group (NHCOCH3) attached to the chain.</p>                                                      |
| 10  | Sphingosine         | C <sub>18</sub> H <sub>37</sub> NO <sub>2</sub>                |  <p>The structure of Sphingosine shows a long hydrocarbon chain with a double bond, a hydroxyl group (OH), and an amino group (NH2) attached to the chain.</p>                                                                                 |
| 11  | Antibiotic BK230    | C <sub>57</sub> H <sub>91</sub> N <sub>9</sub> O <sub>14</sub> |  <p>The structure of Antibiotic BK230 is a complex macrocyclic molecule with multiple amide bonds, hydroxyl groups, and a piperidine ring system.</p>                                                                                          |

**Table S4**Metabolites from *P. antarcticum* MGK31.

| No. | Proposed ID        | Formula                                                       | Structure                                                                            |
|-----|--------------------|---------------------------------------------------------------|--------------------------------------------------------------------------------------|
| 12  | Arohynapene A      | C <sub>18</sub> H <sub>22</sub> O <sub>3</sub>                | 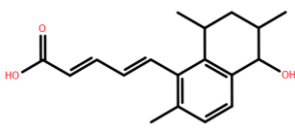   |
| 13  | Chrysogine         | C <sub>10</sub> H <sub>10</sub> N <sub>2</sub> O <sub>2</sub> |    |
| 14  | L-Phe-L-His        | C <sub>15</sub> H <sub>18</sub> N <sub>4</sub> O <sub>3</sub> |   |
| 15  | Cyclo(L-Phe-L-Pro) | C <sub>14</sub> H <sub>16</sub> N <sub>2</sub> O <sub>2</sub> |  |
| 16  | Penicitrinol P     | C <sub>16</sub> H <sub>20</sub> O <sub>6</sub>                |  |

|    |                      |                    |  |
|----|----------------------|--------------------|--|
| 17 | Trans-Resorcylyde    | $C_{16}H_{18}O_5$  |  |
| 18 | Penexanthone B       | $C_{19}H_{20}O_8$  |  |
| 19 | Cladosporin          | $C_{16}H_{20}O_5$  |  |
| 20 | Penicisochroman A    | $C_{16}H_{18}O_4$  |  |
| 21 | Antibiotic TAN 1446A | $C_{17}H_{22}O_5$  |  |
| 22 | Chrysogeside C       | $C_{40}H_{73}NO_9$ |  |

**Table S5**Metabolites from *C. rogersoniana* MGK33.

| No. | Proposed ID          | Formula                                                       | Structure                                                                            |
|-----|----------------------|---------------------------------------------------------------|--------------------------------------------------------------------------------------|
| 23  | Gadusol              | C <sub>8</sub> H <sub>12</sub> O <sub>6</sub>                 | 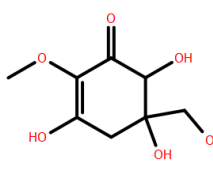   |
| 24  | Bionectin F          | C <sub>50</sub> H <sub>96</sub> O <sub>8</sub>                |    |
| 25  | C16 Phytosphingosine | C <sub>16</sub> H <sub>35</sub> NO <sub>3</sub>               |    |
| 26  | L-Ile-L-Pro          | C <sub>11</sub> H <sub>20</sub> N <sub>2</sub> O <sub>3</sub> |  |
| 27  | L-Tryptophan         | C <sub>11</sub> H <sub>12</sub> N <sub>2</sub> O <sub>2</sub> |  |
| 28  | L-Tyrosine           | C <sub>9</sub> H <sub>11</sub> NO <sub>3</sub>                |  |

**Table S6**Metabolites from *P. expansum* MGK42.

| No. | Proposed ID        | Formula                                                       | Structure                                                                                                                                                                                                                                                                                                                                                                                                                                                                                                             |
|-----|--------------------|---------------------------------------------------------------|-----------------------------------------------------------------------------------------------------------------------------------------------------------------------------------------------------------------------------------------------------------------------------------------------------------------------------------------------------------------------------------------------------------------------------------------------------------------------------------------------------------------------|
| 29  | Dihydrovermistatin | C <sub>18</sub> H <sub>18</sub> O <sub>6</sub>                | 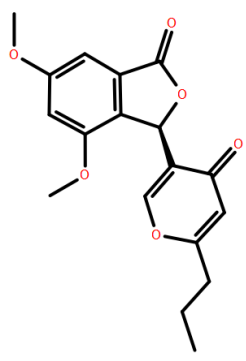 <p>The structure of Dihydrovermistatin is a complex polycyclic molecule. It features a central benzene ring fused to a five-membered ring containing an oxygen atom and a carbonyl group. This central system is further substituted with two methoxy groups on the benzene ring and a side chain consisting of a furan ring fused to a five-membered ring with a carbonyl group, which is in turn attached to a propyl chain.</p> |
| 30  | Sativan            | C <sub>17</sub> H <sub>18</sub> O <sub>4</sub>                |  <p>The structure of Sativan is a biphenyl derivative. It consists of two benzene rings connected by a methylene bridge. One of the benzene rings has a hydroxyl group and a methoxy group, while the other has two methoxy groups.</p>                                                                                                                                                                                             |
| 31  | Canadensolide      | C <sub>11</sub> H <sub>14</sub> O <sub>4</sub>                |  <p>The structure of Canadensolide is a bicyclic molecule. It features a five-membered ring fused to a six-membered ring, both containing oxygen atoms. The structure includes a carbonyl group, a methyl group, and a propyl chain.</p>                                                                                                                                                                                           |
| 32  | Aurantioclavine    | C <sub>15</sub> H <sub>18</sub> N <sub>2</sub>                |  <p>The structure of Aurantioclavine is a complex polycyclic molecule. It features a central benzene ring fused to a five-membered ring containing a nitrogen atom. The structure includes a methyl group, a propyl chain, and a nitrogen atom labeled 'HN'.</p>                                                                                                                                                                  |
| 33  | Clavicipitic acid  | C <sub>16</sub> H <sub>18</sub> N <sub>2</sub> O <sub>2</sub> |  <p>The structure of Clavicipitic acid is a complex polycyclic molecule. It features a central benzene ring fused to a five-membered ring containing a nitrogen atom. The structure includes a methyl group, a propyl chain, and a carboxylic acid group labeled 'OH'.</p>                                                                                                                                                        |

---

34 Roquefortine C

$C_{22}H_{23}N_5O_2$

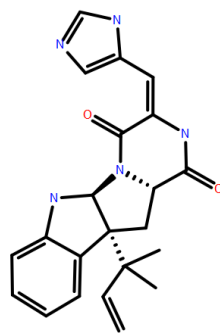

---

35 Roquefortine D

$C_{22}H_{25}N_5O_2$

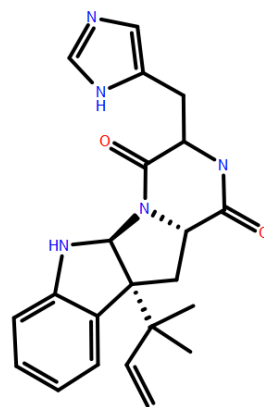

---

36 (16R)-Hydroxyroquefortine C

$C_{22}H_{23}N_5O_3$

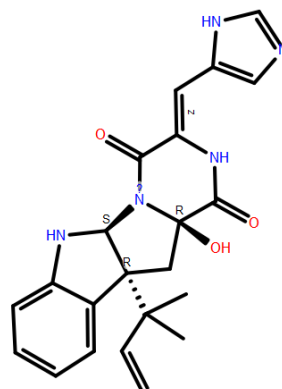



---

37 Cyclo(L-Phe-L-Phe)

$C_{18}H_{18}N_2O_2$

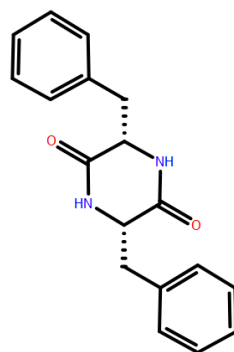

---

38 Dehydrohistidyl-tryptophanyl-diketopiperazine

$C_{17}H_{15}N_5O_2$

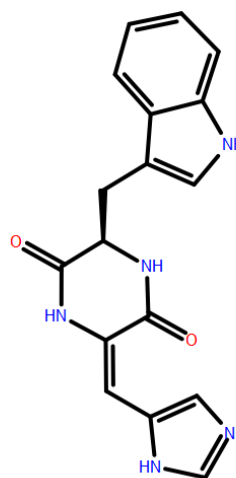

---

39 Communesin E

$C_{27}H_{30}N_4O_2$

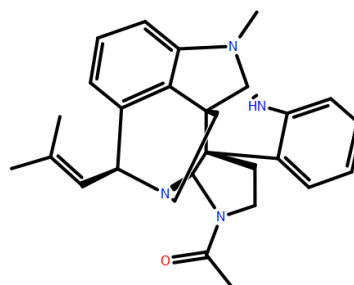

---

40 Commnesin 470

$C_{27}H_{34}O_7$

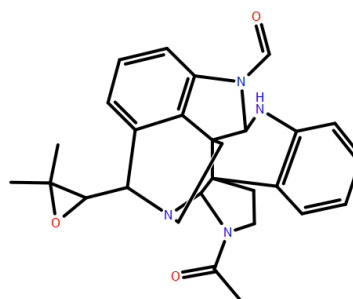

---

41 24-Oxocyclocitrinol

$C_{25}H_{34}O_4$

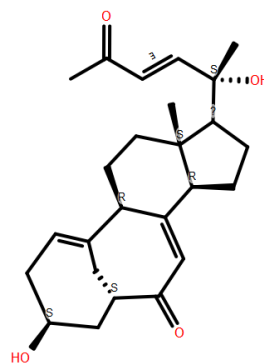

---

42 Chaetoglobosin E

$C_{32}H_{38}N_2O_5$

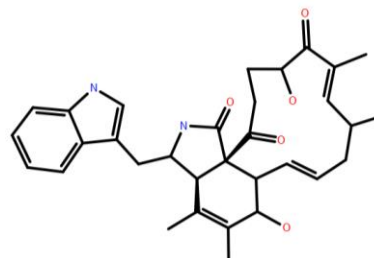

---

43 Commnesin B

$C_{32}H_{36}N_4O_2$

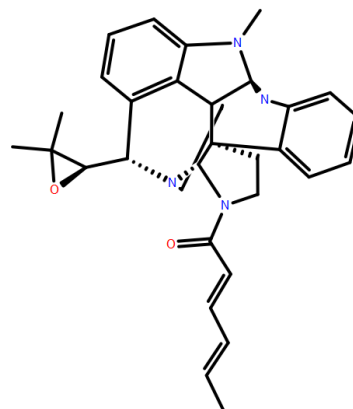

44 Citrinin

$C_{13}H_{14}O_5$

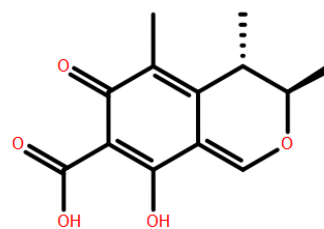

45 Viridicatin

$C_{15}H_{11}NO_2$

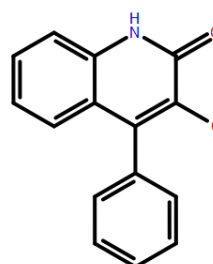

46 Chaetoglobosin A

$C_{32}H_{36}N_2O_5$

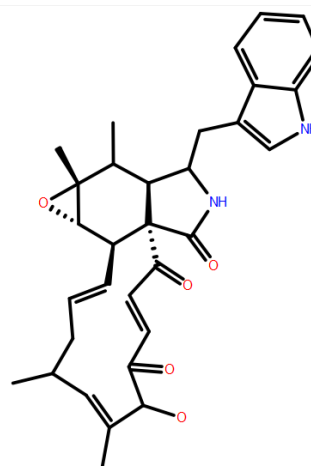

47 Deformylcalbistrin A

$C_{30}H_{40}O_7$

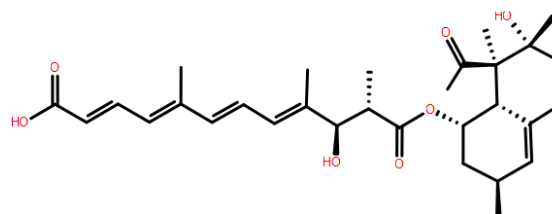

---

48 Chaetoglobosin F

$C_{32}H_{38}N_2O_5$

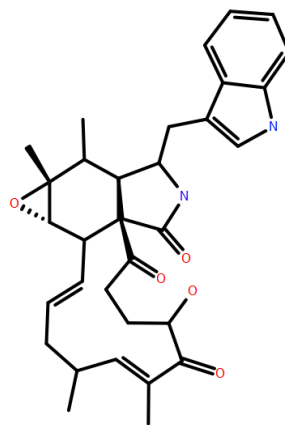

---

49 Communesin D

$C_{32}H_{34}N_4O_3$

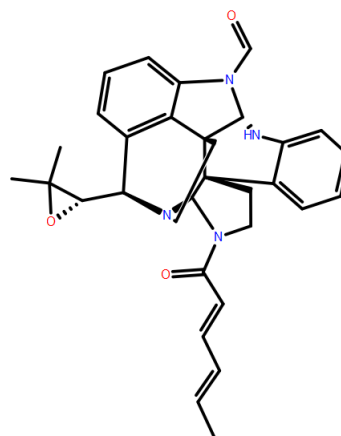

---

50 Andrastin A

$C_{28}H_{38}O_7$

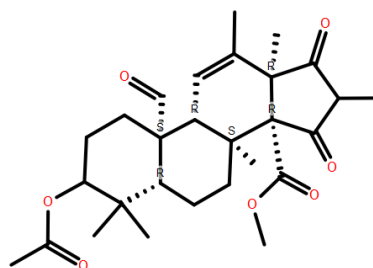

51 Chaetoglobosin D

$C_{32}H_{36}N_2O_5$

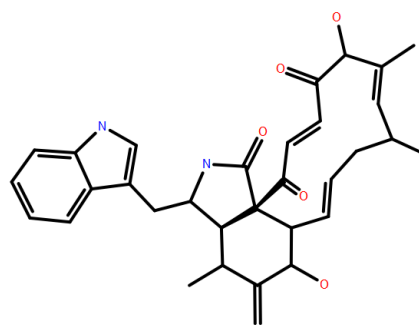

52 Cytoglobosin D

$C_{32}H_{38}N_2O_4$

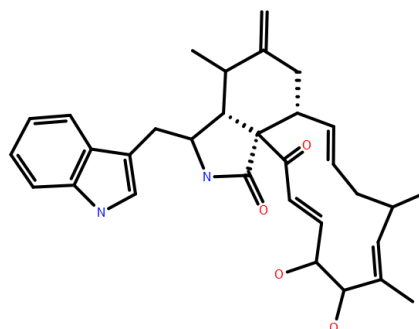

53 Chaetoglobosin J

$C_{32}H_{36}N_2O_4$

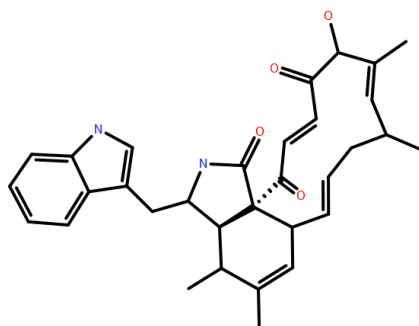

54 Chrysogeside A

$C_{40}H_{73}NO_9$

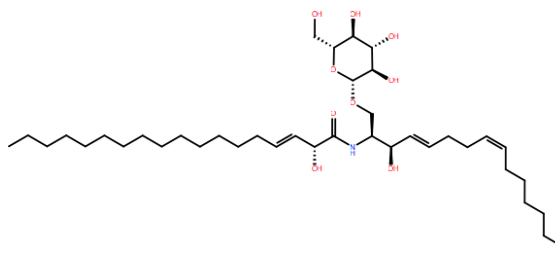

**Table S7.**  
Metabolites common to two or more fungal isolates.

| No. | Proposed ID        | Formula                                                       | Metabolite occurrence*                    | Structure                                                                            |
|-----|--------------------|---------------------------------------------------------------|-------------------------------------------|--------------------------------------------------------------------------------------|
| 55  | Choline sulfate    | C <sub>5</sub> H <sub>13</sub> NO <sub>4</sub> S              | MGK13<br>MGK20<br>MGK31                   | 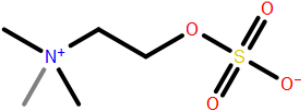   |
| 56  | L-Carnitine        | C <sub>7</sub> H <sub>15</sub> NO <sub>3</sub>                | MGK13<br>MGK14<br>MGK20<br>MGK31<br>MGK42 |    |
| 57  | Adenosine          | C <sub>10</sub> H <sub>13</sub> N <sub>5</sub> O <sub>4</sub> | MGK20<br>MGK33                            |   |
| 58  | Cyclo(L-Leu-L-Pro) | C <sub>11</sub> H <sub>18</sub> N <sub>2</sub> O <sub>2</sub> | MGK31<br>MGK33                            |  |
| 59  | Cyclo(L-Pro-L-Val) | C <sub>10</sub> H <sub>16</sub> N <sub>2</sub> O <sub>2</sub> | MGK20<br>MGK31                            |  |

|    |                                    |                                                              |                                           |                                                                                      |
|----|------------------------------------|--------------------------------------------------------------|-------------------------------------------|--------------------------------------------------------------------------------------|
| 60 | Pyridoxamine                       | C <sub>8</sub> H <sub>12</sub> N <sub>2</sub> O <sub>2</sub> | MGK20<br>MGK31                            | 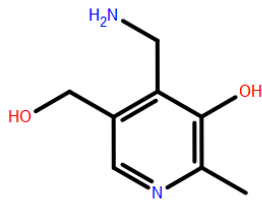   |
| 61 | Phytosphingosine                   | C <sub>18</sub> H <sub>39</sub> NO <sub>3</sub>              | MGK13<br>MGK14<br>MGK20<br>MGK31<br>MGK42 |    |
| 62 | Sphinganine                        | C <sub>18</sub> H <sub>39</sub> NO <sub>2</sub>              | MGK13<br>MGK14<br>MGK20<br>MGK31<br>MGK42 |    |
| 63 | Citreospirosteroid                 | C <sub>28</sub> H <sub>44</sub> O <sub>4</sub>               | MGK31<br>MGK42                            |   |
| 64 | Chrysoreside B                     | C <sub>41</sub> H <sub>75</sub> NO <sub>9</sub>              | MGK31<br>MGK42                            |  |
| 65 | Ergosta-4,6,8(14),22-tetraen-3-one | C <sub>28</sub> H <sub>40</sub> O                            | MGK13<br>MGK31                            |  |

\*Abbreviations represent fungal isolates as follows: **MGK13** = *F. oxysporum* MGK13; **MGK14** = *M. circinelloides* MGK14; **MGK20** = *C. eragrosticola* MGK20; **MGK31** = *P. antarcticum* MGK31; **MGK33** = *C. rogersoniana* MGK33 and **MGK42** = *P. expansum* MGK42.
